# Supplementary material
Source: MDPI journal article supplement (https://www.mdpi.com/2297-8739/10/12/588)
Supplement: s1 [file s1]

**Table S1** Characterization of compounds in Qingkailing capsules by UHPLC-FT-ICR-MS

| No. | RT (min) | Identification                  | [M+H] <sup>+</sup> |            |             | [M-H] <sup>-</sup> |            |             | Formula                                                       | MS/MS ( <i>m/z</i> )         |
|-----|----------|---------------------------------|--------------------|------------|-------------|--------------------|------------|-------------|---------------------------------------------------------------|------------------------------|
|     |          |                                 | Observed           | Calculated | Error (ppm) | Observed           | Calculated | Error (ppm) |                                                               |                              |
| 1   | 0.92     | Arginine                        | 175.11894          | 175.11895  | 0.08        | -                  | -          | -           | C <sub>6</sub> H <sub>14</sub> N <sub>4</sub> O <sub>2</sub>  | (+): 158                     |
| 2   | 0.95     | Gluconic acid                   | -                  | -          | -           | 195.05067          | 195.05103  | 1.83        | C <sub>6</sub> H <sub>12</sub> O <sub>7</sub>                 | (-): 129                     |
| 3   | 0.97     | Quinic acid                     | -                  | -          | -           | 191.05575          | 191.05611  | 1.92        | C <sub>7</sub> H <sub>12</sub> O <sub>6</sub>                 | (-): 173, 127                |
| 4   | 0.97     | D-Sorbitol                      | -                  | -          | -           | 181.07141          | 181.07176  | 1.92        | C <sub>6</sub> H <sub>14</sub> O <sub>6</sub>                 | (-): 101                     |
| 5   | 1.01     | Sucrose                         | 343.12279          | 343.12349  | 2.03        | 341.10831          | 341.10894  | 1.83        | C <sub>12</sub> H <sub>22</sub> O <sub>11</sub>               | (-): 179                     |
| 6   | 1.16     | Cytidine                        | 244.09270          | 244.09280  | 0.39        | -                  | -          | -           | C <sub>9</sub> H <sub>13</sub> N <sub>3</sub> O <sub>5</sub>  | (+): 112                     |
| 7   | 1.25     | Malic acid                      | -                  | -          | -           | 133.01398          | 133.01425  | 2.00        | C <sub>4</sub> H <sub>6</sub> O <sub>5</sub>                  | (-): 115                     |
| 8   | 1.36     | Uridine                         | 245.07655          | 245.07681  | 1.07        | 243.06188          | 243.06226  | 1.57        | C <sub>9</sub> H <sub>12</sub> N <sub>2</sub> O <sub>6</sub>  | (-): 110                     |
| 9   | 1.36     | Tyrosine                        | 182.08128          | 182.08117  | -0.59       | -                  | -          | -           | C <sub>9</sub> H <sub>11</sub> NO <sub>3</sub>                | (+): 165, 147, 136           |
| 10  | 1.37     | Adenosine                       | 268.10407          | 268.10403  | -0.14       | -                  | -          | -           | C <sub>10</sub> H <sub>13</sub> N <sub>5</sub> O <sub>4</sub> | (+): 136                     |
| 11  | 1.39     | Guanosine                       | 284.09899          | 284.09894  | -0.16       | 282.08428          | 282.08439  | 0.40        | C <sub>10</sub> H <sub>13</sub> N <sub>5</sub> O <sub>5</sub> | (+): 152                     |
| 12  | 1.44     | Leucine                         | 132.10188          | 132.10191  | 0.18        | -                  | -          | -           | C <sub>6</sub> H <sub>13</sub> NO <sub>2</sub>                | (+): 115, 104                |
| 13  | 1.61     | Quinic acid                     | 337.11343          | 337.11292  | -1.50       | 335.09805          | 335.09837  | 0.95        | C <sub>13</sub> H <sub>20</sub> O <sub>10</sub>               | (-): 191                     |
|     |          | 3-hydroxy-3-methylpentanedioate |                    |            |             |                    |            |             |                                                               |                              |
| 14  | 1.73     | Gardoside                       | -                  | -          | -           | 373.11365          | 373.11402  | 0.99        | C <sub>16</sub> H <sub>22</sub> O <sub>10</sub>               | (-): 211                     |
| 15  | 1.98     | Phenylalanine hexose            | 328.13925          | 328.13908  | -0.52       | 326.12427          | 326.12453  | 0.78        | C <sub>15</sub> H <sub>21</sub> NO <sub>7</sub>               | (-): 164                     |
| 16  | 2.00     | Shanzhiside                     | -                  | -          | -           | 391.12421          | 391.12459  | 0.97        | C <sub>16</sub> H <sub>24</sub> O <sub>11</sub>               | (-): 229                     |
| 17  | 2.00     | Phenylalanine                   | 166.08635          | 166.08626  | -0.56       | 164.07148          | 164.07170  | 1.37        | C <sub>9</sub> H <sub>11</sub> NO <sub>2</sub>                | (-): 147                     |
| 18  | 2.02     | Deacetylasperulosidic acid      | 391.12351          | 391.12349  | -0.06       | 389.10853          | 389.10894  | 1.05        | C <sub>16</sub> H <sub>22</sub> O <sub>11</sub>               | (-): 345, 227, 209, 183, 165 |

|    |      |                                                         |           |           |                    |           |           |                   |                                                               |                                 |
|----|------|---------------------------------------------------------|-----------|-----------|--------------------|-----------|-----------|-------------------|---------------------------------------------------------------|---------------------------------|
| 19 | 2.23 | Dihydroxybenzoic acid glucoside                         | -         | -         | -                  | 315.07191 | 315.07216 | 0.79              | C <sub>13</sub> H <sub>16</sub> O <sub>9</sub>                | (-): 153, 109                   |
| 20 | 2.25 | Vanillic acid hexose                                    | -         | -         | -                  | 329.08764 | 329.08781 | 0.49              | C <sub>14</sub> H <sub>18</sub> O <sub>9</sub>                | (-): 167                        |
| 21 | 2.29 | Geniposidic acid                                        | 375.12932 | 375.12857 | -1.99              | 373.11379 | 373.11402 | 0.60              | C <sub>16</sub> H <sub>22</sub> O <sub>10</sub>               | (-): 211, 193,<br>167, 149, 123 |
| 22 | 2.34 | Ixoroside                                               | 383.13160 | 383.13125 | -0.91 <sup>a</sup> | 405.14001 | 405.14024 | 0.32 <sup>b</sup> | C <sub>16</sub> H <sub>24</sub> O <sub>9</sub>                | (-): 359                        |
| 23 | 2.48 | 6-oxo demethylgenipin<br>1- <i>O</i> -glucopyranoside   | -         | -         | -                  | 387.09310 | 387.09329 | 0.49              | C <sub>16</sub> H <sub>20</sub> O <sub>11</sub>               | (-): 343                        |
| 24 | 2.63 | Dihydroxybenzoic acid glucoside<br>isomer               | -         | -         | -                  | 315.07180 | 315.07216 | 1.12              | C <sub>13</sub> H <sub>16</sub> O <sub>9</sub>                | (-): 153                        |
| 25 | 2.73 | Deacetyl asperulosidic acid methyl<br>ester             | 427.12128 | 427.12108 | -0.45 <sup>a</sup> | 449.12961 | 449.13006 | 1.02 <sup>b</sup> | C <sub>17</sub> H <sub>24</sub> O <sub>11</sub>               | (-): 403, 241                   |
| 26 | 2.91 | 1- <i>O</i> -syringoyl-β- <i>D</i> -glucopyranosid<br>e | -         | -         | -                  | 359.09825 | 359.09837 | 0.32              | C <sub>15</sub> H <sub>20</sub> O <sub>10</sub>               | (-): 197                        |
| 27 | 3.14 | Gardenoside                                             | 427.12140 | 427.12108 | -0.73 <sup>a</sup> | 449.12985 | 449.13006 | 0.43 <sup>b</sup> | C <sub>17</sub> H <sub>24</sub> O <sub>11</sub>               | (-): 241                        |
| 28 | 3.37 | Neochlorogenic acid                                     | 355.10273 | 355.10236 | -1.06              | 353.08734 | 353.08781 | 1.33              | C <sub>16</sub> H <sub>18</sub> O <sub>9</sub>                | (-): 191, 179,<br>173, 135      |
| 29 | 3.43 | Jasminoside G                                           | 347.17023 | 347.17004 | -0.54              | 345.15516 | 345.15549 | 0.96              | C <sub>16</sub> H <sub>26</sub> O <sub>8</sub>                | (-): 165                        |
| 30 | 3.52 | Scandoside methyl ester                                 | 427.12134 | 427.12108 | -0.60 <sup>a</sup> | 449.12988 | 449.13006 | 0.41 <sup>b</sup> | C <sub>17</sub> H <sub>24</sub> O <sub>11</sub>               | (-): 241                        |
| 31 | 3.62 | Tryptophan                                              | 205.09700 | 205.09715 | 0.74               | 203.08236 | 203.08260 | 1.21              | C <sub>11</sub> H <sub>12</sub> N <sub>2</sub> O <sub>2</sub> | (+): 188, 146                   |
| 32 | 3.97 | Shanzhiside methyl ester                                | -         | -         | -                  | 405.13993 | 405.14024 | 0.74              | C <sub>17</sub> H <sub>26</sub> O <sub>11</sub>               | -                               |
| 33 | 4.14 | Unknown                                                 | 350.18188 | 350.18094 | -2.69              | 348.16748 | 348.16639 | -3.13             | C <sub>15</sub> H <sub>27</sub> NO <sub>8</sub>               | -                               |
| 34 | 4.33 | Esculin                                                 | -         | -         | -                  | 339.07191 | 339.07216 | 0.71              | C <sub>15</sub> H <sub>16</sub> O <sub>9</sub>                | (-):177                         |
| 35 | 4.46 | Jasminoside B                                           | 347.16997 | 347.17004 | 0.23               | 345.15519 | 345.15549 | 0.86              | C <sub>16</sub> H <sub>26</sub> O <sub>8</sub>                | (-): 165                        |
| 36 | 4.54 | Loganic acid                                            | 377.14408 | 377.14422 | 0.38               | 375.12925 | 375.12967 | 1.13              | C <sub>16</sub> H <sub>24</sub> O <sub>10</sub>               | (-): 213                        |
| 37 | 4.82 | Isaindigodione isomer                                   | 327.13379 | 327.13393 | 0.44               | -         | -         | -                 | C <sub>18</sub> H <sub>18</sub> N <sub>2</sub> O <sub>4</sub> | (+): 201                        |
| 38 | 4.85 | Kingside                                                | 427.12109 | 427.12108 | -0.02 <sup>a</sup> | 449.12946 | 449.13006 | 1.36 <sup>b</sup> | C <sub>17</sub> H <sub>24</sub> O <sub>11</sub>               | (-): 403                        |

|    |      |                                                                       |           |           |                    |           |           |                   |                                                               |                              |
|----|------|-----------------------------------------------------------------------|-----------|-----------|--------------------|-----------|-----------|-------------------|---------------------------------------------------------------|------------------------------|
| 39 | 4.90 | Jasminoside C                                                         | -         | -         | -                  | 327.14454 | 327.14493 | 1.18              | C <sub>16</sub> H <sub>24</sub> O <sub>7</sub>                | -                            |
| 40 | 4.95 | Coniferin                                                             | 365.12070 | 365.12069 | -0.03 <sup>a</sup> | 387.12949 | 387.12967 | 0.48 <sup>b</sup> | C <sub>16</sub> H <sub>22</sub> O <sub>8</sub>                | (-): 341, 179                |
| 41 | 5.28 | 3-p-coumaroylquinic acid                                              | 339.10742 | 339.10744 | 0.07               | 337.09270 | 337.09289 | 0.58              | C <sub>16</sub> H <sub>18</sub> O <sub>8</sub>                | (-): 191, 163                |
| 42 | 5.33 | Shanzhiside methyl ester                                              | -         | -         | -                  | 405.13994 | 405.14024 | 0.73              | C <sub>17</sub> H <sub>26</sub> O <sub>11</sub>               | (-): 243                     |
| 43 | 5.34 | Isaindigodione                                                        | 327.13403 | 327.13393 | -0.30              | -         | -         | -                 | C <sub>18</sub> H <sub>18</sub> N <sub>2</sub> O <sub>4</sub> | (+): 201                     |
| 44 | 5.36 | 7-epiloganin                                                          | -         | -         | -                  | 389.14515 | 389.14532 | 0.44              | C <sub>17</sub> H <sub>26</sub> O <sub>10</sub>               | -                            |
| 45 | 5.43 | Indole-3-acetonitrile-6-O-β-D-glucopyranoside                         | 335.12460 | 335.12376 | -2.50              | 379.11432 | 379.11469 | 0.97 <sup>b</sup> | C <sub>16</sub> H <sub>18</sub> N <sub>2</sub> O <sub>6</sub> | (-): 333, 306, 144           |
| 46 | 5.59 | Chlorogenic acid*                                                     | 355.10242 | 355.10236 | -0.17              | 353.08719 | 353.08781 | 1.76              | C <sub>16</sub> H <sub>18</sub> O <sub>9</sub>                | (-): 191, 179, 173, 135      |
| 47 | 5.59 | Syringin                                                              | 390.17740 | 390.17586 | -3.95 <sup>c</sup> | 417.13993 | 417.14024 | 0.72 <sup>b</sup> | C <sub>17</sub> H <sub>24</sub> O <sub>9</sub>                | (-): 209                     |
| 48 | 5.59 | Secologanoside                                                        | 391.12351 | 391.12349 | -0.06              | 389.10805 | 389.10894 | 2.28              | C <sub>16</sub> H <sub>22</sub> O <sub>11</sub>               | (-): 345, 209, 183, 165, 121 |
| 49 | 5.65 | Indican                                                               | 296.11279 | 296.11286 | 0.25               | 340.10361 | 340.10379 | 0.54 <sup>b</sup> | C <sub>14</sub> H <sub>17</sub> NO <sub>6</sub>               | (-): 294, 161, 132           |
| 50 | 5.65 | Unknown                                                               | -         | -         | -                  | 743.20247 | 743.20402 | 2.08              | C <sub>32</sub> H <sub>40</sub> O <sub>20</sub>               | (-): 191                     |
| 51 | 5.66 | 2,3-dihydro-1H-pyrrolo[2,1-c][1,4]benzodiazepine-5,11(10H,11ah)-dione | 217.09707 | 217.09715 | 0.39               | -         | -         | -                 | C <sub>12</sub> H <sub>12</sub> N <sub>2</sub> O <sub>2</sub> | (+): 144                     |
| 52 | 5.72 | 8-Epiapodantheroside                                                  | 389.14473 | 389.14422 | -1.31              | -         | -         | -                 | C <sub>17</sub> H <sub>24</sub> O <sub>10</sub>               | -                            |
| 53 | 5.76 | Genipin-1-O-β-D-gentiobioside                                         | 551.19816 | 551.19705 | -2.02              | 595.18640 | 595.18797 | 2.65 <sup>b</sup> | C <sub>23</sub> H <sub>34</sub> O <sub>15</sub>               | (-): 549, 225, 207           |
| 54 | 5.83 | Cryptochlorogenic acid                                                | 355.10258 | 355.10236 | -0.63              | 353.08710 | 353.08781 | 1.99              | C <sub>16</sub> H <sub>18</sub> O <sub>9</sub>                | (-): 191, 179, 173, 135      |
| 55 | 5.90 | 5-O-feruloylquinic acid                                               | 369.11849 | 369.11801 | -1.30              | 367.10279 | 367.10346 | 1.82              | C <sub>17</sub> H <sub>20</sub> O <sub>9</sub>                | (-): 193, 191, 173, 149, 134 |

|    |      |                                                    |           |           |                    |           |           |                   |                                                 |                                   |
|----|------|----------------------------------------------------|-----------|-----------|--------------------|-----------|-----------|-------------------|-------------------------------------------------|-----------------------------------|
| 56 | 5.90 | Secoxyloganin                                      | -         | -         | -                  | 449.12947 | 449.13006 | 1.32              | C <sub>18</sub> H <sub>26</sub> O <sub>13</sub> | -                                 |
| 57 | 6.00 | Unknown                                            | 350.18133 | 350.18094 | -1.09              | 348.16693 | 348.16639 | -1.55             | C <sub>15</sub> H <sub>27</sub> NO <sub>8</sub> | (+): 333                          |
| 58 | 6.04 | 4-sinapoylquinic acid                              | -         | -         | -                  | 397.11337 | 397.11402 | 1.64              | C <sub>18</sub> H <sub>22</sub> O <sub>10</sub> | (-): 223, 191, 169, 146           |
| 59 | 6.04 | Genameside C                                       | 551.19731 | 551.19705 | -0.48              | 595.18690 | 595.18797 | 1.81 <sup>b</sup> | C <sub>23</sub> H <sub>34</sub> O <sub>15</sub> | (-): 549, 225                     |
| 60 | 6.12 | Jasminoside I                                      | 493.22942 | 493.22795 | -2.97              | 537.21744 | 537.21888 | 2.68 <sup>b</sup> | C <sub>22</sub> H <sub>36</sub> O <sub>12</sub> | -                                 |
| 61 | 6.19 | 8-epiloganin                                       | -         | -         | -                  | 435.15027 | 435.15080 | 1.22 <sup>b</sup> | C <sub>17</sub> H <sub>26</sub> O <sub>10</sub> | -                                 |
| 62 | 6.20 | Clemastanin B                                      | 685.27192 | 685.27021 | -2.49              | 729.26019 | 729.26114 | 1.30 <sup>b</sup> | C <sub>32</sub> H <sub>44</sub> O <sub>16</sub> | (-): 683, 521, 359, 329           |
| 63 | 6.23 | Genipin 1- <i>O</i> -apiofuranosyl glucopyranoside | -         | -         | -                  | 565.17717 | 565.17741 | 0.43 <sup>b</sup> | C <sub>22</sub> H <sub>32</sub> O <sub>14</sub> | (-): 519, 225                     |
| 64 | 6.30 | Geniposide                                         | 411.12650 | 411.12617 | -0.80 <sup>a</sup> | 433.13404 | 433.13515 | 2.57 <sup>b</sup> | C <sub>17</sub> H <sub>24</sub> O <sub>10</sub> | (-): 225, 207, 175, 147, 123, 101 |
| 65 | 6.37 | Lariciresinol-4'- <i>O</i> -β-D-glucoside          | -         | -         | -                  | 521.20174 | 521.20284 | 2.10              | C <sub>26</sub> H <sub>34</sub> O <sub>11</sub> | (-): 359                          |
| 66 | 6.39 | Loganin                                            | -         | -         | -                  | 435.15037 | 435.15080 | 0.99 <sup>b</sup> | C <sub>17</sub> H <sub>26</sub> O <sub>10</sub> | (-): 389, 227                     |
| 67 | 6.40 | Genameside D                                       | 551.19810 | 551.19705 | -1.92              | 595.18761 | 595.18797 | 0.62 <sup>b</sup> | C <sub>23</sub> H <sub>34</sub> O <sub>15</sub> | (-): 549, 387, 225                |
| 68 | 6.45 | Genipin 1- <i>O</i> -xylopyranosyl glucopyranoside | -         | -         | -                  | 565.17714 | 565.17741 | 0.47 <sup>b</sup> | C <sub>22</sub> H <sub>32</sub> O <sub>14</sub> | (-): 519, 225                     |
| 69 | 6.56 | 4- <i>p</i> -coumaroylquinic acid                  | 339.10760 | 339.10744 | -0.46              | 337.09252 | 337.09289 | 1.10              | C <sub>16</sub> H <sub>18</sub> O <sub>8</sub>  | (-): 191, 163                     |
| 70 | 6.57 | Dihydrogeniposide                                  | -         | -         | -                  | 435.15039 | 435.15080 | 0.94 <sup>b</sup> | C <sub>17</sub> H <sub>26</sub> O <sub>10</sub> | -                                 |
| 71 | 6.64 | 3,4-dicaffeoyl quinic acid isomer                  | -         | -         | -                  | 515.11893 | 515.11950 | 1.10              | C <sub>25</sub> H <sub>24</sub> O <sub>12</sub> | (-): 353, 191, 179, 135           |
| 72 | 6.66 | 2-hydroxy-1,4-phthalic acid                        | -         | -         | -                  | 181.01393 | 181.01425 | 1.77              | C <sub>8</sub> H <sub>6</sub> O <sub>5</sub>    | (-): 137                          |
| 73 | 6.69 | Sinapoyl glucose                                   | 409.11081 | 409.11052 | -0.71 <sup>a</sup> | 385.11377 | 385.11402 | 0.65              | C <sub>17</sub> H <sub>22</sub> O <sub>10</sub> | (-): 205                          |

|    |      |                                                             |           |           |                    |           |           |                   |                                                  |                         |
|----|------|-------------------------------------------------------------|-----------|-----------|--------------------|-----------|-----------|-------------------|--------------------------------------------------|-------------------------|
| 74 | 6.75 | Jasminoside O                                               | 463.21815 | 463.21739 | -1.64              | 507.20775 | 507.20831 | 1.12 <sup>b</sup> | C <sub>21</sub> H <sub>34</sub> O <sub>11</sub>  | (-): 461                |
| 75 | 6.83 | Epijasminoside A or Jasminoside A/E/K                       | 331.17531 | 331.17513 | -0.53              | 375.16576 | 375.16606 | 0.80 <sup>b</sup> | C <sub>16</sub> H <sub>26</sub> O <sub>7</sub>   | (+): 169                |
| 76 | 6.91 | Epijasminoside A or Jasminoside A/E/K                       | 331.17535 | 331.17513 | -0.66              | 375.16562 | 375.16606 | 1.16 <sup>b</sup> | C <sub>16</sub> H <sub>26</sub> O <sub>7</sub>   | (+): 169                |
| 77 | 6.91 | Acetylchlorogenic acid isomer                               | -         | -         | -                  | 395.09796 | 395.09837 | 1.05              | C <sub>18</sub> H <sub>20</sub> O <sub>10</sub>  | (-): 161                |
| 78 | 6.95 | 3- <i>O</i> -feruloylquinic acid                            | 369.11863 | 369.11801 | -1.68              | 367.10320 | 367.10346 | 0.69              | C <sub>17</sub> H <sub>20</sub> O <sub>9</sub>   | (-): 193, 191, 173, 134 |
| 79 | 7.04 | 3-sinapoylquinic acid                                       | 399.12832 | 399.12857 | 0.63               | 397.11372 | 397.11402 | 0.75              | C <sub>18</sub> H <sub>22</sub> O <sub>10</sub>  | (-): 223, 191, 169, 146 |
| 80 | 7.05 | Acetylchlorogenic acid isomer                               | -         | -         | -                  | 395.09788 | 395.09837 | 1.25              | C <sub>18</sub> H <sub>20</sub> O <sub>10</sub>  | (-): 161                |
| 81 | 7.10 | Epijasminoside A or Jasminoside A/E/K                       | 331.17587 | 331.17513 | -2.24              | 375.16571 | 375.16606 | 0.92 <sup>b</sup> | C <sub>16</sub> H <sub>26</sub> O <sub>7</sub>   | -                       |
| 82 | 7.10 | Liriodendrin                                                | -         | -         | -                  | 787.26423 | 787.26662 | 3.04 <sup>b</sup> | C <sub>34</sub> H <sub>46</sub> O <sub>18</sub>  | (-): 741                |
| 83 | 7.18 | 3- <i>O</i> -caffeoylshikimic acid                          | 337.09182 | 337.09179 | -0.08              | 335.07689 | 335.07724 | 1.05              | C <sub>16</sub> H <sub>16</sub> O <sub>8</sub>   | (-): 179, 161, 135      |
| 84 | 7.25 | 5,5'-dimethoxy lariciresinol-4'- <i>O</i> -glucoside isomer | 605.22142 | 605.22046 | -1.58 <sup>a</sup> | 581.22327 | 581.22396 | 1.20              | C <sub>28</sub> H <sub>38</sub> O <sub>13</sub>  | (-): 415                |
| 85 | 7.26 | Deoxyvasicinone                                             | 187.08655 | 187.08659 | 0.23               | -         | -         | -                 | C <sub>11</sub> H <sub>10</sub> N <sub>2</sub> O | -                       |
| 86 | 7.33 | 4- <i>O</i> -caffeoylshikimic acid                          | 337.09196 | 337.09179 | -0.49              | 335.07695 | 335.07724 | 0.87              | C <sub>16</sub> H <sub>16</sub> O <sub>8</sub>   | (-): 179, 161, 135      |
| 87 | 7.34 | Jasminoside C                                               | 329.15958 | 329.15948 | -0.30              | 373.15012 | 373.15041 | 0.77 <sup>b</sup> | C <sub>16</sub> H <sub>24</sub> O <sub>7</sub>   | (-): 165                |
| 88 | 7.40 | Secoisolariciresinol 4- <i>O</i> -β-D-glucopyranoside       | -         | -         | -                  | 523.21806 | 523.21849 | 0.81              | C <sub>26</sub> H <sub>36</sub> O <sub>11</sub>  | (-): 361, 346, 165      |
| 89 | 7.42 | 3,4-dicaffeoyl quinic acid isomer                           | -         | -         | -                  | 515.11917 | 515.11950 | 0.64              | C <sub>25</sub> H <sub>24</sub> O <sub>12</sub>  | (-): 353, 191, 179, 135 |

|     |      |                                                                       |           |           |                    |           |           |       |                                                  |                                                                 |
|-----|------|-----------------------------------------------------------------------|-----------|-----------|--------------------|-----------|-----------|-------|--------------------------------------------------|-----------------------------------------------------------------|
| 90  | 7.43 | Darendroside B                                                        | -         | -         | -                  | 475.18152 | 475.18210 | 1.22  | C <sub>21</sub> H <sub>32</sub> O <sub>12</sub>  | -                                                               |
| 91  | 7.46 | 1- <i>O</i> -feruloyl heptopyranose                                   | 409.11085 | 409.11052 | -0.80 <sup>a</sup> | 385.11379 | 385.11402 | 0.59  | C <sub>17</sub> H <sub>22</sub> O <sub>10</sub>  | (+): 387                                                        |
| 92  | 7.49 | 5- <i>O</i> -caffeoylshikimic acid                                    | 337.09182 | 337.09179 | -0.08              | 335.07697 | 335.07724 | 0.80  | C <sub>16</sub> H <sub>16</sub> O <sub>8</sub>   | (-): 179, 161, 135                                              |
| 93  | 7.53 | 4- <i>O</i> -feruloylquinic acid                                      | 369.11834 | 369.11801 | -0.91              | 367.10318 | 367.10346 | 0.76  | C <sub>17</sub> H <sub>20</sub> O <sub>9</sub>   | (-): 193, 191, 173                                              |
| 94  | 7.53 | Methyl 5- <i>O</i> -feruloylquininate                                 | 383.13395 | 383.13366 | -0.75              | 381.11878 | 381.11911 | 0.85  | C <sub>18</sub> H <sub>22</sub> O <sub>9</sub>   | (-): 179, 135                                                   |
| 95  | 7.55 | Acetylchlorogenic acid isomer                                         | 397.11398 | 397.11292 | -2.66              | 395.09797 | 395.09837 | 1.01  | C <sub>18</sub> H <sub>20</sub> O <sub>10</sub>  | (-): 161                                                        |
| 96  | 7.67 | 6''- <i>O</i> -trans- <i>p</i> -coumaroylgenipin gentiobioside isomer | -         | -         | -                  | 695.21845 | 695.21927 | 1.19  | C <sub>32</sub> H <sub>40</sub> O <sub>17</sub>  | (-): 163                                                        |
| 97  | 7.84 | 10- <i>O</i> -succinoylgeniposide isomer                              | -         | -         | -                  | 487.14520 | 487.14571 | 1.06  | C <sub>21</sub> H <sub>28</sub> O <sub>13</sub>  | (-): 207                                                        |
| 98  | 7.85 | Rutin                                                                 | 611.16194 | 611.16066 | -2.09              | 609.14541 | 609.14611 | 1.15  | C <sub>27</sub> H <sub>30</sub> O <sub>16</sub>  | (+): 465, 303                                                   |
| 99  | 7.93 | Kaempferol- <i>O</i> -rutinoside                                      | 595.16659 | 595.16575 | -1.42              | 593.15034 | 593.15119 | 1.43  | C <sub>27</sub> H <sub>30</sub> O <sub>15</sub>  | (+): 449, 287                                                   |
| 100 | 7.97 | 3,3',4-trihydroxy-4-methoxy-7,7'-epoxylignan or isomer                | 331.15398 | 331.15400 | 0.06               | 329.13936 | 329.13945 | 0.27  | C <sub>19</sub> H <sub>22</sub> O <sub>5</sub>   | -                                                               |
| 101 | 7.97 | Isovitexin                                                            | 433.11320 | 433.11292 | -0.63              | 431.09794 | 431.09837 | 0.99  | C <sub>21</sub> H <sub>20</sub> O <sub>10</sub>  | (+): 397, 379, 367, 361, 351, 349, 337, 323, 313, 309, 295, 283 |
| 102 | 7.98 | Ferulic acid                                                          | -         | -         | -                  | 193.05030 | 193.05063 | 1.75  | C <sub>10</sub> H <sub>10</sub> O <sub>4</sub>   | (-): 149                                                        |
| 103 | 7.99 | Lariciresinol-4- <i>O</i> -β- <i>D</i> -glucoside                     | 545.20030 | 545.19933 | -1.78 <sup>a</sup> | 521.20208 | 521.20284 | 1.45  | C <sub>26</sub> H <sub>34</sub> O <sub>11</sub>  | (-): 359                                                        |
| 104 | 8.06 | Isoquercitrin                                                         | 465.10324 | 465.10275 | -1.05              | 463.08825 | 463.08820 | -0.11 | C <sub>21</sub> H <sub>20</sub> O <sub>12</sub>  | (-): 301                                                        |
| 105 | 8.08 | 5,5'-dimethoxy lariciresinol-4'- <i>O</i> -glucoside                  | -         | -         | -                  | 581.22278 | 581.22396 | 2.04  | C <sub>28</sub> H <sub>38</sub> O <sub>13</sub>  | (-): 419                                                        |
| 106 | 8.14 | Neoamygdalin                                                          | 458.16622 | 458.16569 | -1.17              | 456.15052 | 456.15113 | 1.34  | C <sub>20</sub> H <sub>27</sub> NO <sub>11</sub> | (+): 296, 278,                                                  |

|     |      |                                                                       |           |           |                    |           |           |                   |                                                               |                         |
|-----|------|-----------------------------------------------------------------------|-----------|-----------|--------------------|-----------|-----------|-------------------|---------------------------------------------------------------|-------------------------|
|     |      |                                                                       |           |           |                    |           |           |                   |                                                               | 250, 226                |
| 107 | 8.16 | Prinsepiol                                                            | -         | -         | -                  | 389.12433 | 389.12419 | -0.36             | C <sub>20</sub> H <sub>22</sub> O <sub>8</sub>                | (-): 374                |
| 108 | 8.21 | Kaempferol-3- <i>O</i> -rhamnose-7- <i>O</i> -glucose                 | 595.16685 | 595.16575 | -1.85              | 593.15013 | 593.15119 | 1.80              | C <sub>27</sub> H <sub>30</sub> O <sub>15</sub>               | (-): 285                |
| 109 | 8.22 | Conicaoside                                                           | -         | -         | -                  | 551.21258 | 551.21340 | 1.49              | C <sub>27</sub> H <sub>36</sub> O <sub>12</sub>               | -                       |
| 110 | 8.23 | (1R,7R,8S,10R)-7,8,11-trihydroxyguai-4-en-3-one-8-β-D-glucopyranoside | 431.22802 | 431.22756 | -1.07              | 429.21220 | 429.21301 | 1.88              | C <sub>21</sub> H <sub>34</sub> O <sub>9</sub>                | -                       |
| 111 | 8.25 | Scutellarin*                                                          | -         | -         | -                  | 461.07177 | 461.07255 | 1.69              | C <sub>21</sub> H <sub>18</sub> O <sub>12</sub>               | (-): 285, 267, 239      |
| 112 | 8.26 | Hyperoside                                                            | -         | -         | -                  | 463.08806 | 463.08820 | 0.31              | C <sub>21</sub> H <sub>20</sub> O <sub>12</sub>               | (-): 301                |
| 113 | 8.28 | Cynaroside                                                            | 449.10858 | 449.10784 | -1.66              | -         | -         | -                 | C <sub>21</sub> H <sub>20</sub> O <sub>11</sub>               | (+): 287                |
| 114 | 8.28 | 10- <i>O</i> -acetylgeniposide                                        | 453.13749 | 453.13673 | -1.68 <sup>a</sup> | 475.14518 | 475.14571 | 1.14 <sup>b</sup> | C <sub>19</sub> H <sub>26</sub> O <sub>11</sub>               | (-): 209                |
| 115 | 8.33 | Ferulic acid isomer                                                   | -         | -         | -                  | 193.05025 | 193.05063 | 1.96              | C <sub>10</sub> H <sub>10</sub> O <sub>4</sub>                | (-): 149                |
| 116 | 8.40 | 2'- <i>O</i> -trans-p-coumaroylgardoside                              | -         | -         | -                  | 519.15056 | 519.15080 | 0.46              | C <sub>25</sub> H <sub>28</sub> O <sub>12</sub>               | (-): 163, 145, 123      |
| 117 | 8.46 | Methyl 3- <i>O</i> -feruloylquininate                                 | 383.13392 | 383.13366 | -0.69              | 381.11872 | 381.11911 | 1.02              | C <sub>18</sub> H <sub>22</sub> O <sub>9</sub>                | (-): 179, 135           |
| 118 | 8.49 | Quercetin 7- <i>O</i> -glucoside                                      | -         | -         | -                  | 463.08803 | 463.08820 | 0.37              | C <sub>21</sub> H <sub>20</sub> O <sub>12</sub>               | -                       |
| 119 | 8.50 | Isaindigodione isomer                                                 | 327.13404 | 327.13393 | -0.33              | -         | -         | -                 | C <sub>18</sub> H <sub>18</sub> N <sub>2</sub> O <sub>4</sub> | (+): 201                |
| 120 | 8.50 | Acetylchlorogenic acid                                                | 397.11323 | 397.11292 | -0.77              | 395.09803 | 395.09837 | 0.86              | C <sub>18</sub> H <sub>20</sub> O <sub>10</sub>               | (-): 161                |
| 121 | 8.55 | 3,4-dicaffeoyl quinic acid isomer                                     | 517.13394 | 517.13405 | 0.22               | 515.11892 | 515.11950 | 1.12              | C <sub>25</sub> H <sub>24</sub> O <sub>12</sub>               | (-): 353, 191, 179, 135 |
| 122 | 8.64 | 6'- <i>O</i> -trans-sinapoylgardoside                                 | 581.18735 | 581.18648 | -1.49              | 579.17096 | 579.17193 | 1.68              | C <sub>27</sub> H <sub>32</sub> O <sub>14</sub>               | (-): 325, 223, 205      |
| 123 | 8.67 | 6''- <i>O</i> -trans-caffeoylgenipin gentiobioside                    | -         | -         | -                  | 711.21302 | 711.21419 | 1.64              | C <sub>32</sub> H <sub>40</sub> O <sub>18</sub>               | (-): 179, 123           |

|     |      |                                                     |           |           |       |           |           |                   |                                                 |                         |
|-----|------|-----------------------------------------------------|-----------|-----------|-------|-----------|-----------|-------------------|-------------------------------------------------|-------------------------|
| 124 | 8.73 | Nicotiflorin                                        | 595.16702 | 595.16575 | -2.14 | 593.15055 | 593.15119 | 1.08              | C <sub>27</sub> H <sub>30</sub> O <sub>15</sub> | (+): 287                |
| 125 | 8.74 | Jasminoside T                                       | 463.21777 | 463.21739 | -0.83 | 507.20763 | 507.20831 | 1.34 <sup>b</sup> | C <sub>21</sub> H <sub>34</sub> O <sub>11</sub> | (-): 461                |
| 126 | 8.77 | 3,4-dicaffeoyl quinic acid                          | 517.13444 | 517.13405 | -0.76 | 515.11880 | 515.11950 | 1.36              | C <sub>25</sub> H <sub>24</sub> O <sub>12</sub> | (-): 353, 191, 179, 135 |
| 127 | 8.82 | 6'-O-trans-p-coumaroylgeniposidic acid              | -         | -         | -     | 519.15034 | 519.15080 | 0.89              | C <sub>25</sub> H <sub>28</sub> O <sub>12</sub> | (-): 211, 163, 145, 123 |
| 128 | 8.87 | Methyl 4-O-feruloylquinic acid                      | 383.13383 | 383.13366 | -0.45 | 381.11868 | 381.11911 | 1.12              | C <sub>18</sub> H <sub>22</sub> O <sub>9</sub>  | (-): 179, 135           |
| 129 | 8.87 | Isolariciresinol                                    | -         | -         | -     | 405.15511 | 405.15549 | 0.93 <sup>b</sup> | C <sub>20</sub> H <sub>24</sub> O <sub>6</sub>  | (-): 359, 344, 313      |
| 130 | 8.88 | Acteoside                                           | -         | -         | -     | 623.19687 | 623.19814 | 2.04              | C <sub>29</sub> H <sub>36</sub> O <sub>15</sub> | (-): 461, 179, 161      |
| 131 | 8.89 | 10-O-succinoylgeniposide                            | -         | -         | -     | 487.14508 | 487.14571 | 1.31              | C <sub>21</sub> H <sub>28</sub> O <sub>13</sub> | (-): 207                |
| 132 | 8.93 | Chrysin-6,8-di-C-glucoside isomer                   | 579.17083 | 579.17083 | 0.00  | -         | -         | -                 | C <sub>27</sub> H <sub>30</sub> O <sub>14</sub> | -                       |
| 133 | 8.94 | Pinoresinol-4-O-glucoside                           | -         | -         | -     | 519.18678 | 519.18719 | 0.78              | C <sub>26</sub> H <sub>32</sub> O <sub>11</sub> | (-): 357, 342, 151, 136 |
| 134 | 8.95 | Kaempferol-3-O-rhamnose-7-O-glucose isomer          | 595.16702 | 595.16575 | -2.14 | 593.15033 | 593.15119 | 1.46              | C <sub>27</sub> H <sub>30</sub> O <sub>15</sub> | (-): 285                |
| 135 | 8.98 | 11-(6-O-trans-sinapoylglucopyranosyl)-gardendiol    | -         | -         | -     | 565.19196 | 565.19266 | 1.25              | C <sub>27</sub> H <sub>34</sub> O <sub>13</sub> | (-): 325, 295, 265, 223 |
| 136 | 9.01 | 6'-O-trans-sinapoylgardoside isomer                 | 581.18696 | 581.18648 | -0.82 | 579.17113 | 579.17193 | 1.39              | C <sub>27</sub> H <sub>32</sub> O <sub>14</sub> | (-): 325, 223, 205      |
| 137 | 9.12 | 6''-O-trans-p-coumaroylgenipin gentiobioside isomer | 697.23441 | 697.23383 | -0.83 | 695.21800 | 695.21927 | 1.83              | C <sub>32</sub> H <sub>40</sub> O <sub>17</sub> | (-): 469, 163           |
| 138 | 9.13 | 3,5-dicaffeoyl quinic acid                          | 517.13446 | 517.13405 | -0.78 | 515.11891 | 515.11950 | 1.14              | C <sub>25</sub> H <sub>24</sub> O <sub>12</sub> | (-): 353, 191, 179, 135 |
| 139 | 9.13 | Jasminoside R                                       | -         | -         | -     | 535.20321 | 535.20323 | 0.04 <sup>b</sup> | C <sub>22</sub> H <sub>34</sub> O <sub>12</sub> | -                       |



|     |       |                                                                 |           |           |                    |           |           |                   |                                                                 |                                                       |
|-----|-------|-----------------------------------------------------------------|-----------|-----------|--------------------|-----------|-----------|-------------------|-----------------------------------------------------------------|-------------------------------------------------------|
| 140 | 9.13  | Acanthoside B                                                   | 603.20543 | 603.20481 | -1.02 <sup>a</sup> | 579.20755 | 579.20831 | 1.31              | C <sub>28</sub> H <sub>36</sub> O <sub>13</sub>                 | (-): 417, 402                                         |
| 141 | 9.16  | Aschantin                                                       | 401.15937 | 401.15948 | 0.27               | -         | -         | -                 | C <sub>22</sub> H <sub>24</sub> O <sub>7</sub>                  | -                                                     |
| 142 | 9.28  | Rhoifolin                                                       | 579.17148 | 579.17083 | -1.11              | 577.15535 | 577.15628 | 1.61              | C <sub>27</sub> H <sub>30</sub> O <sub>14</sub>                 | (+): 271                                              |
| 143 | 9.42  | Isorhamnetin-3- <i>O</i> -glucoside                             | -         | -         | -                  | 477.10445 | 477.10385 | -1.26             | C <sub>22</sub> H <sub>22</sub> O <sub>12</sub>                 | -                                                     |
| 144 | 9.43  | 10- <i>O</i> -acetylgeniposide isomer                           | 453.13697 | 453.13673 | -0.53 <sup>a</sup> | 475.14511 | 475.14571 | 1.28 <sup>b</sup> | C <sub>19</sub> H <sub>26</sub> O <sub>11</sub>                 | (-): 209                                              |
| 145 | 9.50  | Apigenin-7- <i>O</i> -glucoside                                 | 433.11322 | 433.11292 | -0.69              | 431.09786 | 431.09837 | 1.17              | C <sub>21</sub> H <sub>20</sub> O <sub>10</sub>                 | (-): 269                                              |
| 146 | 9.58  | Hesperidin                                                      | -         | -         | -                  | 609.18270 | 609.18249 | -0.34             | C <sub>28</sub> H <sub>34</sub> O <sub>15</sub>                 | (-): 301                                              |
| 147 | 9.68  | Indole-3-acetonitrile-2- <i>S</i> -β- <i>D</i> -glucopyranoside | 351.10091 | 351.10092 | 0.03               | 349.08600 | 349.08637 | 1.05              | C <sub>16</sub> H <sub>18</sub> N <sub>2</sub> O <sub>5</sub> S | (-): 187, 160                                         |
| 148 | 9.70  | 4,5-dicaffeoyl quinic acid                                      | 517.13420 | 517.13405 | -0.29              | 515.11855 | 515.11950 | 1.85              | C <sub>25</sub> H <sub>24</sub> O <sub>12</sub>                 | (-): 353, 191, 179, 135                               |
| 149 | 9.77  | 6''- <i>O</i> -trans- <i>p</i> -coumaroylgenipin gentiobioside  | 697.23462 | 697.23383 | -1.14              | 695.21785 | 695.21927 | 2.04              | C <sub>32</sub> H <sub>40</sub> O <sub>17</sub>                 | (-): 469, 367, 349, 307, 265, 235, 207, 163, 145, 123 |
| 150 | 9.87  | Salicylic acid                                                  | -         | -         | -                  | 137.02415 | 137.02442 | 1.97              | C <sub>7</sub> H <sub>6</sub> O <sub>3</sub>                    | -                                                     |
| 151 | 9.93  | 6''- <i>O</i> -trans-sinapoylgenipin gentiobioside              | 757.25583 | 757.25496 | -1.15              | 755.23836 | 755.24040 | 2.71              | C <sub>34</sub> H <sub>44</sub> O <sub>19</sub>                 | (-): 427, 325, 265, 223, 205                          |
| 152 | 10.03 | 3- <i>O</i> -caffeoyl-4- <i>O</i> -sinapoylquinic acid          | 561.16064 | 561.16027 | -0.67              | 559.14498 | 559.14571 | 1.31              | C <sub>27</sub> H <sub>28</sub> O <sub>13</sub>                 | (-): 397, 379, 353, 335, 223, 205, 191, 179, 173      |
| 153 | 10.05 | Chrysoeriol-5- <i>O</i> -β- <i>D</i> -glucuronide               | 477.10278 | 477.10275 | -0.06              | 475.08767 | 475.08820 | 1.11              | C <sub>22</sub> H <sub>20</sub> O <sub>12</sub>                 | (-): 299, 284                                         |
| 154 | 10.07 | 6''- <i>O</i> -trans-feruloylgenipin gentiobioside              | 727.24492 | 727.24439 | -0.72              | 725.22797 | 725.22984 | 2.57              | C <sub>33</sub> H <sub>42</sub> O <sub>18</sub>                 | (-): 397, 295, 235, 225, 207, 193, 175, 123           |

|     |       |                                                                                                                                             |           |           |       |           |           |      |                                                                 |                                                  |
|-----|-------|---------------------------------------------------------------------------------------------------------------------------------------------|-----------|-----------|-------|-----------|-----------|------|-----------------------------------------------------------------|--------------------------------------------------|
| 155 | 10.10 | 3-(2'-carboxyphenyl)-4(3 <i>H</i> )-quinazolinone                                                                                           | 267.07650 | 267.07642 | -0.29 | 265.06144 | 265.06187 | 1.62 | C <sub>15</sub> H <sub>10</sub> N <sub>2</sub> O <sub>3</sub>   | (+): 249                                         |
| 156 | 10.18 | Scutellarein-4'-methyl ether- <i>O</i> -glucuronide                                                                                         | 477.10276 | 477.10275 | -0.02 | 475.08762 | 475.08820 | 1.22 | C <sub>22</sub> H <sub>20</sub> O <sub>12</sub>                 | (-): 299, 284, 267                               |
| 157 | 10.20 | 3,5-di- <i>O</i> -caffeoyl-4- <i>O</i> -(3-hydroxy-3-methyl) glutarylquinic acid                                                            | 661.17685 | 661.17631 | -0.82 | 659.16082 | 659.16176 | 1.42 | C <sub>31</sub> H <sub>32</sub> O <sub>16</sub>                 | (-): 353, 191                                    |
| 158 | 10.27 | 8-hydroxypinoresinol                                                                                                                        | -         | -         | -     | 373.12859 | 373.12928 | 1.84 | C <sub>20</sub> H <sub>22</sub> O <sub>7</sub>                  | (-): 313                                         |
| 159 | 10.33 | Crocin I                                                                                                                                    | -         | -         | -     | 975.37050 | 975.37148 | 1.00 | C <sub>44</sub> H <sub>64</sub> O <sub>24</sub>                 | (-): 651                                         |
| 160 | 10.39 | 8-hydroxysyringaresinol                                                                                                                     | 435.16490 | 435.16496 | 0.14  | 433.15006 | 433.15041 | 0.80 | C <sub>22</sub> H <sub>26</sub> O <sub>9</sub>                  | (-): 403, 385, 373, 358, 343, 325                |
| 161 | 10.38 | Pinoresinol-4- <i>O</i> -glucoside isomer                                                                                                   | -         | -         | -     | 519.18682 | 519.18719 | 0.71 | C <sub>26</sub> H <sub>32</sub> O <sub>11</sub>                 | (-): 357, 342                                    |
| 162 | 10.40 | Methyl caffeate                                                                                                                             | -         | -         | -     | 193.05033 | 193.05063 | 1.57 | C <sub>10</sub> H <sub>10</sub> O <sub>4</sub>                  | (-): 161                                         |
| 163 | 10.43 | Secoisolariciresinol                                                                                                                        | -         | -         | -     | 361.16517 | 361.16566 | 1.35 | C <sub>20</sub> H <sub>26</sub> O <sub>6</sub>                  | (-): 346, 165                                    |
| 164 | 10.63 | Hydroxymedioresinol                                                                                                                         | 405.15380 | 405.15439 | 1.47  | 403.13953 | 403.13984 | 0.77 | C <sub>21</sub> H <sub>24</sub> O <sub>8</sub>                  | (-): 343                                         |
| 165 | 10.71 | Indole-3-acetonitrile-4-methoxy-2- <i>S</i> -β-D-glucopyranoside or <i>N</i> -methoxyindole-3-acetonitrile-2- <i>S</i> -β-D-glucopyranoside | 381.11170 | 381.11148 | -0.57 | 379.09650 | 379.09693 | 1.13 | C <sub>17</sub> H <sub>20</sub> N <sub>2</sub> O <sub>6</sub> S | (+): 219                                         |
| 166 | 10.73 | 6'-trans-sinapoylgeniposide isomer                                                                                                          | -         | -         | -     | 593.18666 | 593.18758 | 1.56 | C <sub>28</sub> H <sub>34</sub> O <sub>14</sub>                 | -                                                |
| 167 | 10.78 | 6'- <i>O</i> -trans-sinapoyl jasminoside L                                                                                                  | 553.22815 | 553.22795 | -0.35 | 551.21256 | 551.21340 | 1.52 | C <sub>27</sub> H <sub>36</sub> O <sub>12</sub>                 | (-): 223                                         |
| 168 | 10.83 | 5- <i>O</i> -caffeoyl-4- <i>O</i> -sinapoylquinic acid                                                                                      | 561.16062 | 561.16027 | -0.63 | 559.14497 | 559.14571 | 1.33 | C <sub>27</sub> H <sub>28</sub> O <sub>13</sub>                 | (-): 397, 379, 353, 335, 223, 205, 191, 179, 173 |

|     |       |                                                               |           |           |       |           |           |      |                                                               |                         |
|-----|-------|---------------------------------------------------------------|-----------|-----------|-------|-----------|-----------|------|---------------------------------------------------------------|-------------------------|
| 169 | 11.04 | Baicalin*                                                     | 447.09147 | 447.09219 | 1.61  | 445.07661 | 445.07763 | 2.31 | C <sub>21</sub> H <sub>18</sub> O <sub>11</sub>               | (-): 269, 251, 241, 223 |
| 170 | 11.12 | Fisetin                                                       | 287.05482 | 287.05501 | 0.68  | 285.03979 | 285.04046 | 2.36 | C <sub>15</sub> H <sub>10</sub> O <sub>6</sub>                | (+): 137                |
| 171 | 11.18 | Oroxin A                                                      | 433.11293 | 433.11292 | -0.01 | 431.09763 | 431.09837 | 1.73 | C <sub>21</sub> H <sub>20</sub> O <sub>10</sub>               | (+): 271                |
| 172 | 11.21 | 5- <i>O</i> -caffeoyl-4- <i>O</i> -sinapoylquinic acid isomer | 561.16119 | 561.16027 | -1.65 | 559.14468 | 559.14571 | 1.85 | C <sub>27</sub> H <sub>28</sub> O <sub>13</sub>               | (-): 223                |
| 173 | 11.24 | 3-(2'-hydroxyphenyl)-4-(3 <i>H</i> )-quinazolinone            | 239.08141 | 239.08150 | 0.38  | -         | -         | -    | C <sub>14</sub> H <sub>10</sub> N <sub>2</sub> O <sub>2</sub> | (+): 221                |
| 174 | 11.41 | 6'-trans-sinapoylgeniposide                                   | 595.20212 | 595.20213 | 0.02  | 593.18659 | 593.18758 | 1.67 | C <sub>28</sub> H <sub>34</sub> O <sub>14</sub>               | (-): 367, 223, 205, 123 |
| 175 | 11.49 | 6''- <i>O</i> -trans-coumaroylgeniposide                      | 535.18076 | 535.18100 | 0.45  | 533.16588 | 533.16645 | 1.07 | C <sub>26</sub> H <sub>30</sub> O <sub>12</sub>               | (-): 307, 145           |
| 176 | 11.49 | 6'- <i>O</i> -trans-sinapoyljasminoside L isomer              | 553.22812 | 553.22795 | -0.30 | 551.21263 | 551.21340 | 1.39 | C <sub>27</sub> H <sub>36</sub> O <sub>12</sub>               | (-): 265                |
| 177 | 11.78 | Chrysoeriol-7- <i>O</i> -β-D-glucuronide                      | 477.10243 | 477.10275 | 0.67  | 475.08770 | 475.08820 | 1.06 | C <sub>22</sub> H <sub>20</sub> O <sub>12</sub>               | (-): 299, 284           |
| 178 | 11.92 | 5,6-dihydroxyl flavanone-7- <i>O</i> -glucuronide             | -         | -         | -     | 447.09274 | 447.09329 | 1.21 | C <sub>21</sub> H <sub>20</sub> O <sub>11</sub>               | (-): 271                |
| 179 | 12.14 | Oroxylin A-7- <i>O</i> -glucuronide isomer                    | 461.10757 | 461.10784 | 0.59  | 459.09264 | 459.09329 | 1.40 | C <sub>22</sub> H <sub>20</sub> O <sub>11</sub>               | -                       |
| 180 | 12.21 | Norwogonin-7- <i>O</i> -glucuronide                           | 447.09176 | 447.09219 | 0.95  | 445.07686 | 445.07763 | 1.73 | C <sub>21</sub> H <sub>18</sub> O <sub>11</sub>               | (-): 269                |
| 181 | 12.42 | Fisetin isomer                                                | 287.05465 | 287.05501 | 1.27  | 285.04016 | 285.04046 | 1.04 | C <sub>15</sub> H <sub>10</sub> O <sub>6</sub>                | (-): 241                |
| 182 | 12.51 | Hydroxyl oroxylin-A-7- <i>O</i> -glucuronide                  | 477.10233 | 477.10275 | 0.88  | 475.08769 | 475.08820 | 1.08 | C <sub>22</sub> H <sub>20</sub> O <sub>12</sub>               | (-): 299                |
| 183 | 12.55 | Phellinsin A                                                  | -         | -         | -     | 357.06119 | 357.06159 | 1.11 | C <sub>18</sub> H <sub>14</sub> O <sub>8</sub>                | -                       |
| 184 | 12.72 | Dihydroxyflavone- <i>O</i> -glucopyranoside                   | 417.11788 | 417.11801 | 0.30  | -         | -         | -    | C <sub>21</sub> H <sub>20</sub> O <sub>9</sub>                | (+): 255                |
| 185 | 12.73 | Norwogonin-8- <i>O</i> -glucuronide                           | 447.09171 | 447.09219 | 1.07  | 445.07691 | 445.07763 | 1.63 | C <sub>21</sub> H <sub>18</sub> O <sub>11</sub>               | (-): 269                |

|     |       |                                                                   |           |           |                   |           |           |                   |                                                 |                                         |
|-----|-------|-------------------------------------------------------------------|-----------|-----------|-------------------|-----------|-----------|-------------------|-------------------------------------------------|-----------------------------------------|
|     |       | isomer                                                            |           |           |                   |           |           |                   |                                                 |                                         |
| 186 | 12.81 | Luteolin*                                                         | 287.05489 | 287.05501 | 0.43              | 285.04015 | 285.04046 | 1.09              | C <sub>15</sub> H <sub>10</sub> O <sub>6</sub>  | (-): 241, 217,<br>199, 175, 151,<br>133 |
| 187 | 12.81 | Tricin 7- <i>O</i> -glucoside                                     | -         | -         | -                 | 491.11918 | 491.11950 | 0.65              | C <sub>23</sub> H <sub>24</sub> O <sub>12</sub> | (-): 329, 313                           |
| 188 | 12.83 | Quercetin                                                         | -         | -         | -                 | 301.03481 | 301.03538 | 1.88              | C <sub>15</sub> H <sub>10</sub> O <sub>7</sub>  | -                                       |
| 189 | 12.89 | Oroxylin A-7- <i>O</i> -glucuronide*                              | 461.10720 | 461.10784 | 1.39              | 459.09243 | 459.09329 | 1.87              | C <sub>22</sub> H <sub>20</sub> O <sub>11</sub> | (+): 285, 270                           |
| 190 | 13.00 | Chrysin-7- <i>O</i> -glucuronide                                  | 431.09730 | 431.09727 | -0.07             | 429.08197 | 429.08272 | 1.75              | C <sub>21</sub> H <sub>18</sub> O <sub>10</sub> | (-): 253                                |
| 191 | 13.09 | Hydroxyl wogonoside                                               | 477.10274 | 477.10275 | 0.02              | 475.08787 | 475.08820 | 0.70              | C <sub>22</sub> H <sub>20</sub> O <sub>12</sub> | (-): 299                                |
| 192 | 13.29 | 6''- <i>O</i> -trans- <i>p</i> -cinnamoylgenipin<br>gentiobioside | 703.22056 | 703.22086 | 0.43 <sup>a</sup> | 725.22860 | 725.22984 | 1.71 <sup>b</sup> | C <sub>32</sub> H <sub>40</sub> O <sub>16</sub> | (-): 531, 355,<br>225, 207, 147,<br>123 |
| 193 | 13.35 | Norwogonin-8- <i>O</i> -glucuronide                               | 447.09160 | 447.09219 | 1.32              | 445.07686 | 445.07763 | 1.74              | C <sub>21</sub> H <sub>18</sub> O <sub>11</sub> | (-): 269                                |
| 194 | 13.46 | Oroxin A isomer                                                   | 433.11242 | 433.11292 | 1.16              | 431.09801 | 431.09837 | 0.84              | C <sub>21</sub> H <sub>20</sub> O <sub>10</sub> | (+): 271                                |
| 195 | 13.61 | Wogonoside*                                                       | 461.10741 | 461.10784 | 0.93              | 459.09240 | 459.09329 | 1.93              | C <sub>22</sub> H <sub>20</sub> O <sub>11</sub> | (-): 283, 268                           |
| 196 | 13.87 | Baicalin isomer                                                   | 447.09155 | 447.09219 | 1.44              | 445.07707 | 445.07763 | 1.26              | C <sub>21</sub> H <sub>18</sub> O <sub>11</sub> | (-): 269                                |
| 197 | 13.99 | 6'- <i>O</i> -trans-sinapoyl jasminoside A                        | 537.23257 | 537.23304 | 0.87              | 535.21786 | 535.21849 | 1.18              | C <sub>27</sub> H <sub>36</sub> O <sub>11</sub> | -                                       |
| 198 | 13.99 | 5,7-dihydroxy-6,8-dimethoxyflavo<br>ne-7- <i>O</i> -glucuronide   | 491.11798 | 491.11840 | 0.86              | 489.10346 | 489.10385 | 0.80              | C <sub>23</sub> H <sub>22</sub> O <sub>12</sub> | (+): 315, 285                           |
| 199 | 14.09 | Baicalin ethyl ester or isomer                                    | 475.12292 | 475.12349 | 1.19              | 473.10849 | 473.10894 | 0.95              | C <sub>23</sub> H <sub>22</sub> O <sub>11</sub> | (+): 271                                |
| 200 | 14.11 | Fisetin isomer                                                    | 287.05497 | 287.05501 | 0.15              | 285.04011 | 285.04046 | 1.23              | C <sub>15</sub> H <sub>10</sub> O <sub>6</sub>  | (-): 241                                |
| 201 | 14.66 | 6'-trans-sinapoylgeniposide<br>isomer                             | 617.18321 | 617.18408 | 1.40 <sup>a</sup> | 593.18695 | 593.18758 | 1.06              | C <sub>28</sub> H <sub>34</sub> O <sub>14</sub> | (-): 367, 223,<br>205, 123              |
| 202 | 14.75 | 6'- <i>O</i> -trans-sinapoyljasminoside C                         | 535.21673 | 535.21739 | 1.22              | 533.20211 | 533.20284 | 1.36              | C <sub>27</sub> H <sub>34</sub> O <sub>11</sub> | (-): 223, 205                           |
| 203 | 14.77 | Baicalin ethyl ester or isomer                                    | 475.12276 | 475.12349 | 1.53              | 473.10828 | 473.10894 | 1.38              | C <sub>23</sub> H <sub>22</sub> O <sub>11</sub> | (-): 269                                |
| 204 | 15.09 | Apigenin*                                                         | 271.06019 | 271.06010 | -0.33             | 269.04512 | 269.04555 | 1.59              | C <sub>15</sub> H <sub>10</sub> O <sub>5</sub>  | (-): 237, 227,                          |

|     |       |                                                                      |           |           |       |           |           |      |                                                 |                                                                             |
|-----|-------|----------------------------------------------------------------------|-----------|-----------|-------|-----------|-----------|------|-------------------------------------------------|-----------------------------------------------------------------------------|
|     |       |                                                                      |           |           |       |           |           |      |                                                 | 225, 209,<br>201,183, 181,<br>175, 151, 149                                 |
| 205 | 15.09 | Tenaxin II                                                           | 301.07030 | 301.07066 | 1.22  | 299.05570 | 299.05611 | 1.39 | C <sub>16</sub> H <sub>12</sub> O <sub>6</sub>  | (-): 284                                                                    |
| 206 | 15.49 | Tectorigenin                                                         | 301.07033 | 301.07066 | 1.10  | 299.05569 | 299.05611 | 1.40 | C <sub>16</sub> H <sub>12</sub> O <sub>6</sub>  | (-): 284                                                                    |
| 207 | 15.61 | 9,12-dihydroxy-13-oxooctadec-14-<br>enoic acid                       | 329.23259 | 329.23225 | -1.03 | 327.21728 | 327.21770 | 1.27 | C <sub>18</sub> H <sub>32</sub> O <sub>5</sub>  | (-): 291, 273,<br>247, 239, 229,<br>211, 209, 203,<br>197, 193, 183,<br>171 |
| 208 | 15.73 | Norwogonin                                                           | 271.05982 | 271.06010 | 1.02  | 269.04515 | 269.04555 | 1.49 | C <sub>15</sub> H <sub>10</sub> O <sub>5</sub>  | (+): 253, 225                                                               |
| 209 | 15.85 | Baicalin ethyl ester or isomer                                       | 475.12266 | 475.12349 | 1.74  | 473.10820 | 473.10894 | 1.55 | C <sub>23</sub> H <sub>22</sub> O <sub>11</sub> | (-): 269                                                                    |
| 210 | 15.91 | 9,12-dihydroxy-13-oxooctadec-14-<br>enoic acid isomer                | 329.23156 | 329.23225 | 2.10  | 327.21722 | 327.21770 | 1.44 | C <sub>18</sub> H <sub>32</sub> O <sub>5</sub>  | (-): 229, 211,<br>183, 171                                                  |
| 211 | 16.08 | 4'-hydroxyl wogonin                                                  | 301.07023 | 301.07066 | 1.45  | 299.05566 | 299.05611 | 1.52 | C <sub>16</sub> H <sub>12</sub> O <sub>6</sub>  | (+): 286                                                                    |
| 212 | 16.34 | Baicalein*                                                           | 271.05970 | 271.06010 | 1.49  | 269.04510 | 269.04555 | 1.65 | C <sub>15</sub> H <sub>10</sub> O <sub>5</sub>  | (+): 253, 225                                                               |
| 213 | 16.35 | Fisetin isomer                                                       | 287.05504 | 287.05501 | -0.09 | 285.03999 | 285.04046 | 1.67 | C <sub>15</sub> H <sub>10</sub> O <sub>6</sub>  | (+): 241                                                                    |
| 214 | 16.41 | Kaempferide isomer                                                   | 301.07062 | 301.07066 | 0.15  | 299.05556 | 299.05611 | 1.86 | C <sub>16</sub> H <sub>12</sub> O <sub>6</sub>  | (+): 286, 258                                                               |
| 215 | 16.57 | Neocrocin E                                                          | -         | -         | -     | 975.36982 | 975.37148 | 1.70 | C <sub>44</sub> H <sub>64</sub> O <sub>24</sub> | (-): 651                                                                    |
| 216 | 16.77 | Tricin                                                               | 331.08103 | 331.08123 | 0.60  | 329.06627 | 329.06668 | 1.23 | C <sub>17</sub> H <sub>14</sub> O <sub>7</sub>  | (-): 314, 299                                                               |
| 217 | 16.88 | Crocin-III or<br>13-cis-croctin-8'-O-β-D-gentiobio<br>side or isomer | 653.28018 | 653.28038 | 0.31  | 651.26341 | 651.26583 | 3.72 | C <sub>32</sub> H <sub>44</sub> O <sub>14</sub> | (-): 327                                                                    |
| 218 | 17.06 | 9,12-dihydroxy-13-oxooctadecanoi<br>c acid                           | -         | -         | -     | 329.23281 | 329.23335 | 1.63 | C <sub>18</sub> H <sub>34</sub> O <sub>5</sub>  | (-): 311, 229,<br>211, 183, 171                                             |
| 219 | 17.13 | 4'-hydroxyl wogonin isomer                                           | -         | -         | -     | 299.05571 | 299.05611 | 1.35 | C <sub>16</sub> H <sub>12</sub> O <sub>6</sub>  | -                                                                           |

|     |       |                                                  |           |           |      |           |           |      |                                                 |                              |
|-----|-------|--------------------------------------------------|-----------|-----------|------|-----------|-----------|------|-------------------------------------------------|------------------------------|
| 220 | 17.62 | Dehydrodeoxycholic acid or isomer                | 389.26791 | 389.26864 | 1.87 | -         | -         | -    | C <sub>24</sub> H <sub>36</sub> O <sub>4</sub>  | (+): 353                     |
| 221 | 17.86 | Tetrahydroxycholan-24-oic acid                   | -         | -         | -    | 423.27447 | 423.27521 | 1.76 | C <sub>24</sub> H <sub>40</sub> O <sub>6</sub>  | (-): 405                     |
| 222 | 18.35 | Glycodeoxycholate                                | 450.32058 | 450.32140 | 1.81 | 448.30582 | 448.30685 | 2.30 | C <sub>26</sub> H <sub>43</sub> NO <sub>5</sub> | (-): 404, 403                |
| 223 | 18.37 | 6'-O-trans-sinapoyljasminoside A                 | -         | -         | -    | 535.21818 | 535.21849 | 0.57 | C <sub>27</sub> H <sub>36</sub> O <sub>11</sub> | -                            |
| 224 | 18.69 | Trihydroxy-dimethoxyflavone                      | 331.08050 | 331.08123 | 2.20 | 329.06615 | 329.06668 | 1.59 | C <sub>17</sub> H <sub>14</sub> O <sub>7</sub>  | (-): 314, 299                |
| 225 | 18.71 | 9,12-dihydroxy-13-oxooctadecanoic acid isomer    | -         | -         | -    | 329.23279 | 329.23335 | 1.69 | C <sub>18</sub> H <sub>34</sub> O <sub>5</sub>  | (-): 311, 229, 211           |
| 226 | 18.94 | 9,12-dihydroxy-13-oxooctadecanoic acid isomer    | -         | -         | -    | 329.23287 | 329.23335 | 1.46 | C <sub>18</sub> H <sub>34</sub> O <sub>5</sub>  | (-): 311, 229, 211           |
| 227 | 18.98 | Dehydrodeoxycholic acid or isomer                | 389.26815 | 389.26864 | 1.25 | -         | -         | -    | C <sub>24</sub> H <sub>36</sub> O <sub>4</sub>  | (+): 353, 335                |
| 228 | 19.17 | 3,12-dihydroxy-7-oxo-5-cholan-24-oic acid isomer | 407.27837 | 407.27920 | 2.04 | 405.26388 | 405.26465 | 1.90 | C <sub>24</sub> H <sub>38</sub> O <sub>5</sub>  | (-): 387, 369, 361, 343, 289 |
| 229 | 19.61 | 9,12-dihydroxy-13-oxooctadecanoic acid isomer    | -         | -         | -    | 329.23276 | 329.23335 | 1.80 | C <sub>18</sub> H <sub>34</sub> O <sub>5</sub>  | (-): 311, 229, 211           |
| 230 | 19.69 | 5,7,3'-trihydroxy-6,4',5'-trimethoxyflavone      | -         | -         | -    | 359.07639 | 359.07724 | 2.36 | C <sub>18</sub> H <sub>16</sub> O <sub>8</sub>  | -                            |
| 231 | 20.14 | 5,2'-dihydroxy-6,7,8-trimethoxyflavone           | 345.09644 | 345.09688 | 1.27 | 343.08168 | 343.08233 | 1.88 | C <sub>18</sub> H <sub>16</sub> O <sub>7</sub>  | (-): 328, 313, 298, 285, 270 |
| 232 | 20.42 | 3-hydroxy-6-oxo-cholan-24-oic acid isomer        | 391.28418 | 391.28429 | 0.28 | -         | -         | -    | C <sub>24</sub> H <sub>38</sub> O <sub>4</sub>  | (+): 355, 337, 319           |
| 233 | 20.42 | Hyocholic acid                                   | 409.29450 | 409.29485 | 0.85 | 407.27999 | 407.28030 | 0.75 | C <sub>24</sub> H <sub>40</sub> O <sub>5</sub>  | (+): 373, 355, 337           |
| 234 | 20.50 | Wogonin*                                         | 285.07532 | 285.07575 | 1.52 | 283.06082 | 283.06120 | 1.34 | C <sub>16</sub> H <sub>12</sub> O <sub>5</sub>  | (+): 270                     |
| 235 | 20.50 | Dehydrodeoxycholic acid or isomer                | 389.26794 | 389.26864 | 1.78 | -         | -         | -    | C <sub>24</sub> H <sub>36</sub> O <sub>4</sub>  | (+): 371, 353,               |

|     |       |                                                                |           |           |       |           |           |                   |                                                 |                                                       |
|-----|-------|----------------------------------------------------------------|-----------|-----------|-------|-----------|-----------|-------------------|-------------------------------------------------|-------------------------------------------------------|
|     |       | isomer                                                         |           |           |       |           |           |                   |                                                 | 335, 317                                              |
| 236 | 20.58 | 9,12-dihydroxy-13-oxooctadecanoic acid isomer                  | -         | -         | -     | 329.23281 | 329.23335 | 1.64              | C <sub>18</sub> H <sub>34</sub> O <sub>5</sub>  | (-): 311, 229, 211                                    |
| 237 | 20.63 | Amentoflavone isomer                                           | 539.09618 | 539.09727 | 2.03  | 537.08230 | 537.08272 | 0.79              | C <sub>30</sub> H <sub>18</sub> O <sub>10</sub> | (-): 375                                              |
| 238 | 20.66 | Chrysin                                                        | 255.06477 | 255.06519 | 1.63  | 253.05015 | 253.05063 | 1.90              | C <sub>15</sub> H <sub>10</sub> O <sub>4</sub>  | (-): 209, 181                                         |
| 239 | 20.71 | Crocin-III or 13-cis-crocetin-8'-O-β-D-gentiobioside or isomer | -         | -         | -     | 651.26416 | 651.26583 | 2.56              | C <sub>32</sub> H <sub>44</sub> O <sub>14</sub> | (-): 327                                              |
| 240 | 20.92 | Skullcapflavone I                                              | 315.08580 | 315.08631 | 1.65  | 313.07119 | 313.07176 | 1.83              | C <sub>17</sub> H <sub>14</sub> O <sub>6</sub>  | (-): 298, 283, 255, 239, 211, 201, 199, 183, 173, 155 |
| 241 | 20.99 | Hyodeoxycholic acid isomer                                     | -         | -         | -     | 437.28983 | 437.29086 | 2.36 <sup>b</sup> | C <sub>24</sub> H <sub>40</sub> O <sub>4</sub>  | (-): 391                                              |
| 242 | 21.00 | Crocin-III or 13-cis-crocetin-8'-O-β-D-gentiobioside or isomer | -         | -         | -     | 651.26419 | 651.26583 | 2.52              | C <sub>32</sub> H <sub>44</sub> O <sub>14</sub> | (-): 327                                              |
| 243 | 21.20 | Skullcapflavone II                                             | 375.10666 | 375.10744 | 2.09  | 373.09218 | 373.09289 | 1.89              | C <sub>19</sub> H <sub>18</sub> O <sub>8</sub>  | (-): 358, 343, 328, 315, 300, 285, 272, 269, 257, 213 |
| 244 | 21.30 | Dehydrodeoxycholic acid or isomer                              | 389.26796 | 389.26864 | 1.73  | -         | -         | -                 | C <sub>24</sub> H <sub>36</sub> O <sub>4</sub>  | (+): 371, 353, 335, 317                               |
| 245 | 21.34 | 3,12-dihydroxy-7-oxo-5-cholan-24-oic acid                      | 407.27833 | 407.27920 | 2.15  | 405.26380 | 405.26465 | 2.09              | C <sub>24</sub> H <sub>38</sub> O <sub>5</sub>  | (-): 361                                              |
| 246 | 21.38 | Oroxylin A                                                     | 285.07527 | 285.07575 | 1.67  | 283.06069 | 283.06120 | 1.78              | C <sub>16</sub> H <sub>12</sub> O <sub>5</sub>  | (+): 270                                              |
| 247 | 21.50 | 3-hydroxy-6-oxo-cholan-24-oic                                  | 391.28467 | 391.28429 | -0.98 | 435.27447 | 435.27521 | 1.70 <sup>b</sup> | C <sub>24</sub> H <sub>38</sub> O <sub>4</sub>  | (-): 389, 371                                         |

|     |       |                                                                        |           |           |                    |           |           |                   |                                                 |                            |
|-----|-------|------------------------------------------------------------------------|-----------|-----------|--------------------|-----------|-----------|-------------------|-------------------------------------------------|----------------------------|
|     |       | acid isomer                                                            |           |           |                    |           |           |                   |                                                 |                            |
| 248 | 21.65 | Cholic acid*                                                           | 409.29494 | 409.29485 | -0.22              | 407.28006 | 407.28030 | 0.59              | C <sub>24</sub> H <sub>40</sub> O <sub>5</sub>  | (-): 343                   |
| 249 | 22.01 | Crocin-III or<br>13-cis-croctetin-8'-O-β-D-gentiobio<br>side or isomer | 653.27815 | 653.28038 | 3.42               | 651.26426 | 651.26583 | 2.42              | C <sub>32</sub> H <sub>44</sub> O <sub>14</sub> | (-): 327                   |
| 250 | 22.42 | Chenodeoxycholic acid                                                  | 393.29839 | 393.29994 | 3.93               | 391.28502 | 391.28538 | 0.93              | C <sub>24</sub> H <sub>40</sub> O <sub>4</sub>  | (-): 373                   |
| 251 | 22.65 | Rivularin                                                              | 345.09644 | 345.09688 | 1.27               | 343.08198 | 343.08233 | 1.01              | C <sub>18</sub> H <sub>16</sub> O <sub>7</sub>  | (-): 328, 313,<br>298, 270 |
| 252 | 23.29 | 3-hydroxy-6-oxo-cholan-24-oic<br>acid isomer                           | 391.28343 | 391.28429 | 2.20               | 435.27436 | 435.27521 | 1.97 <sup>b</sup> | C <sub>24</sub> H <sub>38</sub> O <sub>4</sub>  | (-): 389                   |
| 253 | 23.66 | 3-hydroxy-6-oxo-cholan-24-oic<br>acid isomer                           | -         | -         | -                  | 435.27434 | 435.27521 | 2.00 <sup>b</sup> | C <sub>24</sub> H <sub>38</sub> O <sub>4</sub>  | (-): 389                   |
| 254 | 23.72 | 7-O-methylscutellarein-O-baicalei<br>n                                 | 553.11192 | 553.11292 | 1.81               | 551.09743 | 551.09837 | 1.71              | C <sub>31</sub> H <sub>20</sub> O <sub>10</sub> | (-): 281, 269              |
| 255 | 24.22 | 3-hydroxy-6-oxo-cholan-24-oic<br>acid                                  | 391.28342 | 391.28429 | 2.22               | 435.27418 | 435.27521 | 2.36 <sup>b</sup> | C <sub>24</sub> H <sub>38</sub> O <sub>4</sub>  | (-): 389, 345              |
| 256 | 24.56 | Bis(2-ethylhexyl) phthalate                                            | 391.28345 | 391.28429 | 2.13               | 435.27442 | 435.27521 | 1.81 <sup>b</sup> | C <sub>24</sub> H <sub>38</sub> O <sub>4</sub>  | (-): 389                   |
| 257 | 24.77 | Moslosooflavone                                                        | 299.09125 | 299.09140 | 0.50               | -         | -         | -                 | C <sub>17</sub> H <sub>14</sub> O <sub>5</sub>  | (+): 284, 266,<br>238      |
| 258 | 24.98 | 9/12-Octadecanedioic acid or<br>isomer                                 | 337.23498 | 337.23493 | -0.16 <sup>a</sup> | 313.23850 | 313.23843 | -0.22             | C <sub>18</sub> H <sub>34</sub> O <sub>4</sub>  | (-): 295, 277              |
| 259 | 25.08 | Croctetin                                                              | 329.17413 | 329.17474 | 1.85               | 327.16015 | 327.16018 | 0.09              | C <sub>20</sub> H <sub>24</sub> O <sub>4</sub>  | (-): 283                   |
| 260 | 25.25 | 3-hydroxy-6-oxo-cholan-24-oic<br>acid                                  | 391.28324 | 391.28429 | 2.69               | 435.27450 | 435.27521 | 1.63 <sup>b</sup> | C <sub>24</sub> H <sub>38</sub> O <sub>4</sub>  | (-): 389                   |
| 261 | 25.30 | 9/12-Octadecanedioic acid or<br>isomer                                 | 337.23499 | 337.23493 | -0.19 <sup>a</sup> | 313.23829 | 313.23843 | 0.45              | C <sub>18</sub> H <sub>34</sub> O <sub>4</sub>  | (-): 295                   |



|     |       |                                           |           |           |      |           |           |                   |                                                |                              |
|-----|-------|-------------------------------------------|-----------|-----------|------|-----------|-----------|-------------------|------------------------------------------------|------------------------------|
| 262 | 25.30 | Croctetin isomer                          | 329.17438 | 329.17474 | 1.08 | 327.15998 | 327.16018 | 0.63              | C <sub>20</sub> H <sub>24</sub> O <sub>4</sub> | (-): 283                     |
| 263 | 25.46 | Mosloflavone                              | 299.09101 | 299.09140 | 1.30 | -         | -         | -                 | C <sub>17</sub> H <sub>14</sub> O <sub>5</sub> | (+): 284, 255                |
| 264 | 25.50 | 3-hydroxy-6-oxo-cholan-24-oic acid isomer | -         | -         | -    | 435.27457 | 435.27521 | 1.47 <sup>b</sup> | C <sub>24</sub> H <sub>38</sub> O <sub>4</sub> | (-): 389                     |
| 265 | 25.80 | Croctetin isomer                          | -         | -         | -    | 327.16003 | 327.16018 | 0.45              | C <sub>20</sub> H <sub>24</sub> O <sub>4</sub> | (-): 283                     |
| 266 | 25.85 | Deoxycholic acid                          | -         | -         | -    | 391.28482 | 391.28538 | 1.44              | C <sub>24</sub> H <sub>40</sub> O <sub>4</sub> | (-): 355                     |
| 267 | 26.25 | Hyodeoxycholic acid*                      | -         | -         | -    | 391.28527 | 391.28538 | 0.30              | C <sub>24</sub> H <sub>40</sub> O <sub>4</sub> | (-): 355, 347, 345, 329, 327 |
| 268 | 26.34 | 3-hydroxy-6-oxo-cholan-24-oic acid isomer | -         | -         | -    | 435.27474 | 435.27521 | 1.09 <sup>b</sup> | C <sub>24</sub> H <sub>38</sub> O <sub>4</sub> | (-): 389                     |
| 269 | 26.59 | Croctetin isomer                          | 329.17417 | 329.17474 | 1.70 | 327.16009 | 327.16018 | 0.28              | C <sub>20</sub> H <sub>24</sub> O <sub>4</sub> | (-): 283                     |
| 270 | 26.66 | 3-hydroxy-6-oxo-cholan-24-oic acid        | -         | -         | -    | 435.27444 | 435.27521 | 1.77 <sup>b</sup> | C <sub>24</sub> H <sub>38</sub> O <sub>4</sub> | (-): 389                     |
| 271 | 27.18 | Croctetin isomer                          | 329.17422 | 329.17474 | 1.57 | 327.15996 | 327.16018 | 0.68              | C <sub>20</sub> H <sub>24</sub> O <sub>4</sub> | (-): 283                     |
| 272 | 27.92 | Croctetin isomer                          | -         | -         | -    | 327.16014 | 327.16018 | 0.12              | C <sub>20</sub> H <sub>24</sub> O <sub>4</sub> | (-): 283                     |
| 273 | 29.03 | 9-hydroxyoctadecanoic acid                | -         | -         | -    | 299.25865 | 299.25917 | 1.74              | C <sub>18</sub> H <sub>36</sub> O <sub>3</sub> | -                            |
| 274 | 29.96 | γ-Linolenic acid                          | -         | -         | -    | 277.21672 | 277.21730 | 2.09              | C <sub>18</sub> H <sub>30</sub> O <sub>2</sub> | (-): 233                     |
| 275 | 30.73 | Linoleic acid                             | -         | -         | -    | 279.23226 | 279.23295 | 2.47              | C <sub>18</sub> H <sub>32</sub> O <sub>2</sub> | -                            |
| 276 | 31.60 | Oleic acid                                | -         | -         | -    | 281.24785 | 281.24860 | 2.69              | C <sub>18</sub> H <sub>34</sub> O <sub>2</sub> | -                            |

<sup>a</sup>: [M+Na]<sup>+</sup> ; <sup>b</sup>: [M+HCOO]<sup>-</sup>; <sup>c</sup>: [M+NH<sub>4</sub>]<sup>+</sup>. -: not detected. \*Compared with a reference standard.
